# Supplementary material for: Transcription Factor OpWRKY3 Is Involved in the Development and Biosynthesis of Camptothecin and Its Precursors in Ophiorrhiza pumila Hairy Roots
Source: PubMed Central journal article supplement (PMC6719216; doi:10.3390/ijms20163996), 2019-08-16
Supplement: ijms-20-03996-s001.pdf [file ijms-20-03996-s001.pdf]

## Supplementary material

**Figure S1** Transformation of *O. pumila* explants for hairy roots lines. (A) Wild *O. pumila* seedlings; (B) Aseptic *O. pumila* seedlings; (C) Stem explants for transformation; (D) Hairy root derived from the wounding sites of stems; (E) Single-line hairy root cultured on plate; (F) Hairy root cultured in B5 liquid medium in flask

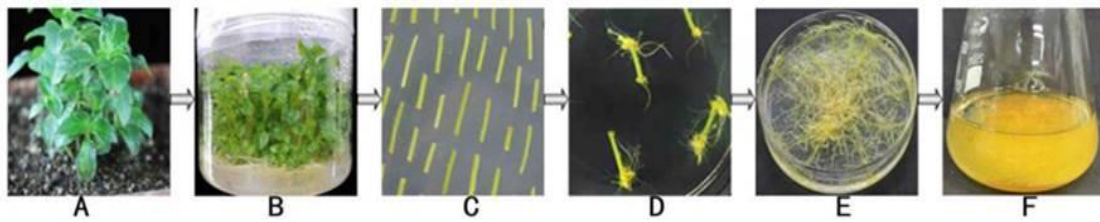

**Figure S2** Expression pattern of *OpWRKY3* in transgenic hairy roots

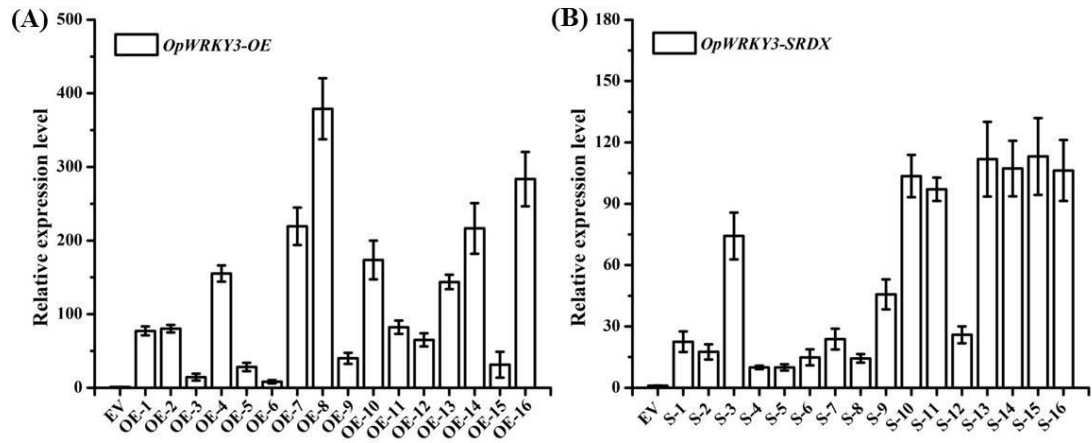

**Figure S3** The fresh weight (FW) and dry weight (DW) of *OpWRKY3* transgenic hairy roots after shake-flask culture

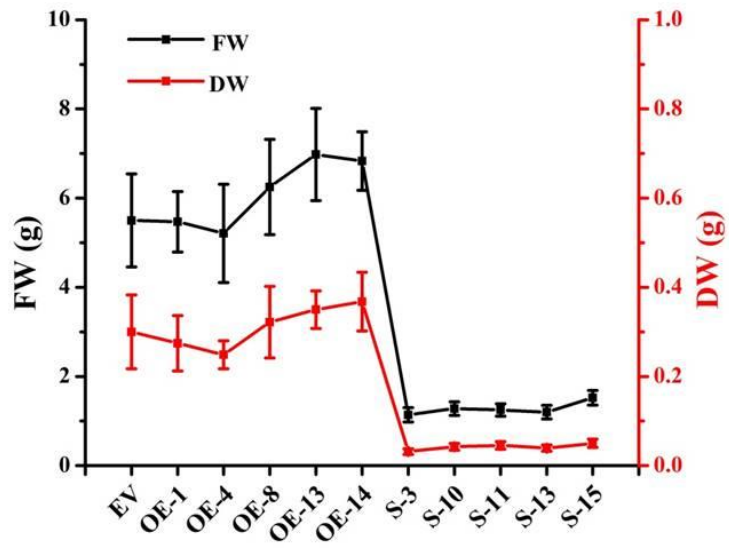

**Figure S4** The content of CPT and its precursors in *OpWRKY3* transgenic hairy roots by HPLC. (A) The tryptamine content in *OpWRKY3* transgenic hairy roots by HPLC; (B) The loganin content in *OpWRKY3* transgenic hairy roots by HPLC; (C) The secologanin content in *OpWRKY3* transgenic hairy roots by HPLC; (D) The camptothecin content in *OpWRKY3* transgenic hairy roots by HPLC. Values are means  $\pm$  standard deviation of triplicate analyses. \*, significant at  $P < 0.05$ ; \*\*, highly significant at  $P < 0.01$ .

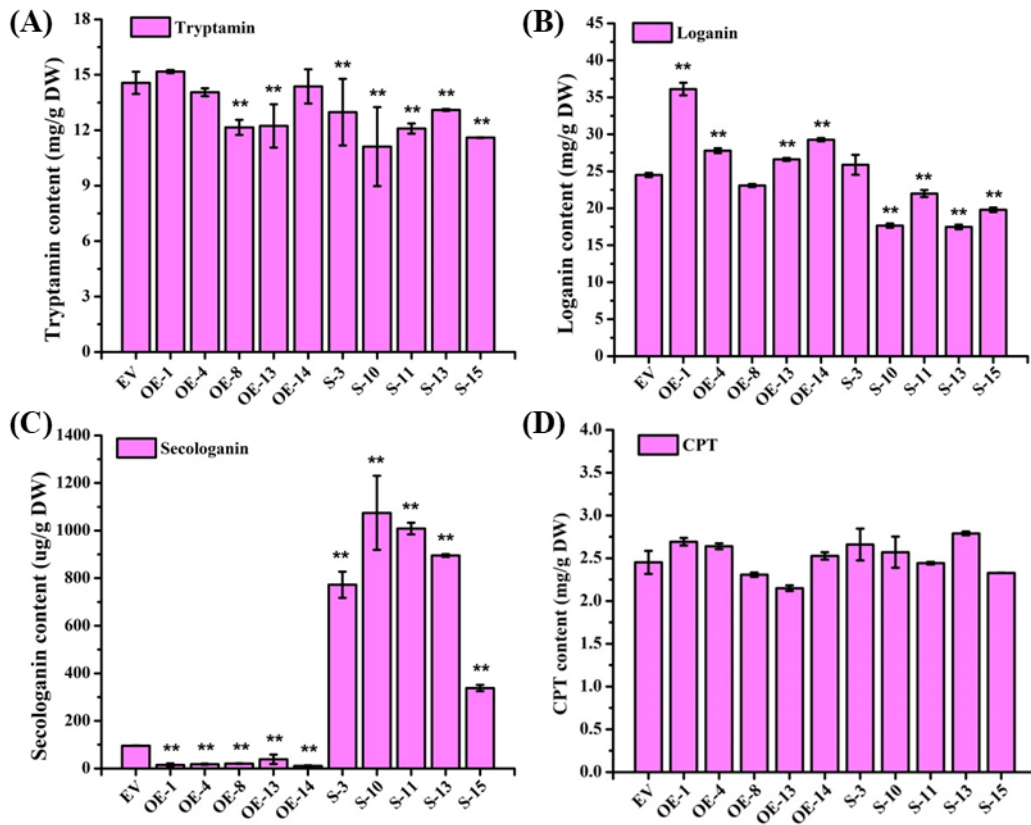

**Figure S5** Camptothecin biosynthetic pathway in *O. pumila*. TSB, tryptophan synthase beta; TDC, tryptophan decarboxylase; G10H, geraniol-10-hydroxylase; 10-HGO, 10-hydroxy-geraniol oxidoreductase; SLS, secologanin synthase; CPR, NADPH-Cytochrome P450 reductase; STR, strictosidine synthase; SGD, strictosidine beta-glucosidase.

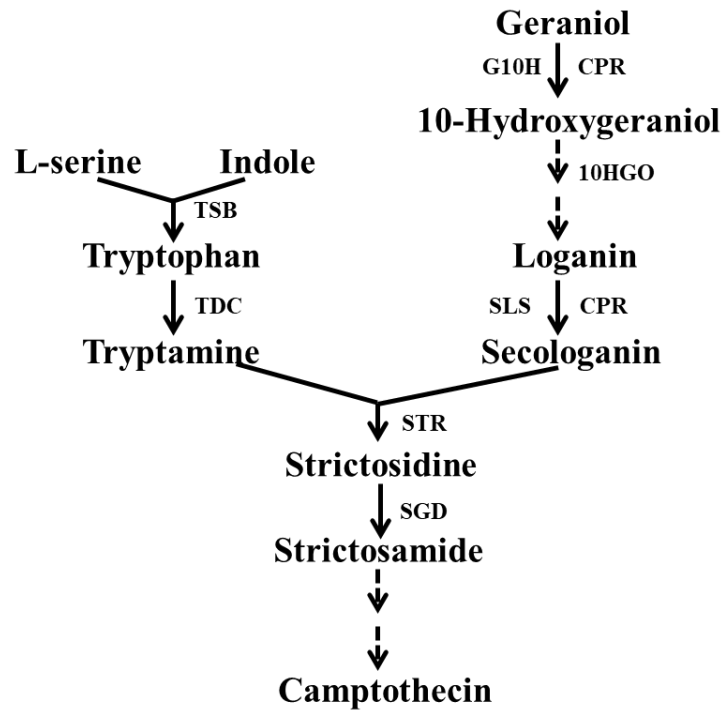

**Figure S6** Expression vectors construction for transformation

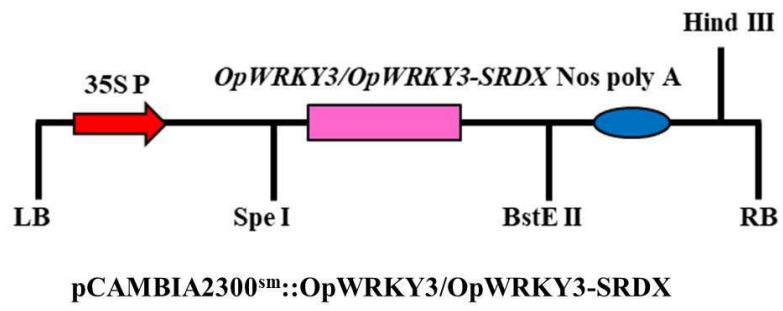

**Figure S7** Analysis of tryptamine, loganin, secologanin and CPT standard by HPLC

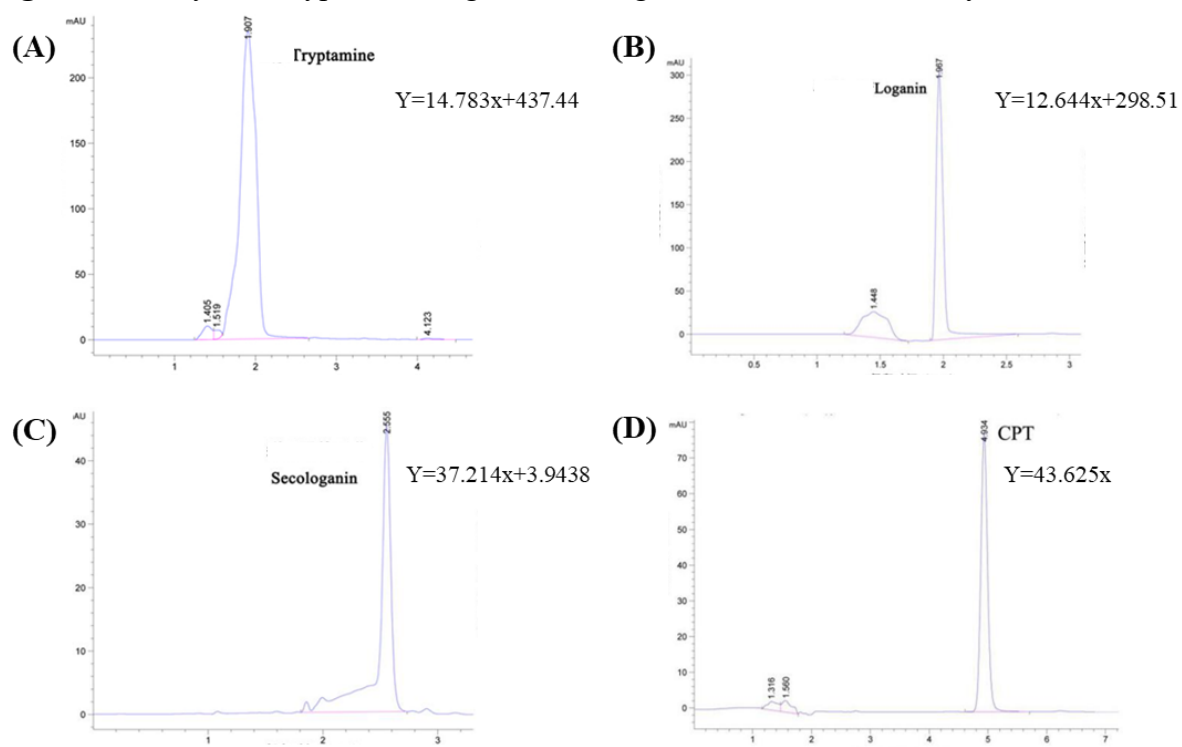

**Table S1** Oligonucleotide primers used in this study

| <b>Primer name</b>                         | <b>Primer sequence (5→3)</b>                                            | <b>Application</b>                |
|--------------------------------------------|-------------------------------------------------------------------------|-----------------------------------|
| OpWRKY3-F1                                 | CTTCAATTCTGCTCGTCTGTCGT                                                 | Cloning                           |
| OpWRKY3-R1                                 | CAGGAGGTTTCCAGTTTCCACAA                                                 | Cloning                           |
| GFP-OpWRKY3-KF-BglII                       | GGAAGATCTATGGAGAATTCAGCAG                                               | Subcellular localization          |
| GFP-OpWRKY3-KR-KpnI                        | CGGGGTACCCCGAAAAGAATCCTGA                                               | Subcellular localization          |
| 2300 <sup>sm</sup> -OpWRKY3-OE-KF-SpeI     | ACTAGTATGGAGAATTCAGCAG                                                  | Overexpression construct assembly |
| 2300 <sup>sm</sup> -OpWRKY3-OE-KR-BstEII   | GGTCACCTCAGGAAAAGAATCC                                                  | Overexpression construct assembly |
| 2300 <sup>sm</sup> -OpWRKY3-SRDX-KF-SpeI   | ACTAGTATGGAGAATTCAGCAG                                                  | Repression construct assembly     |
| 2300 <sup>sm</sup> -OpWRKY3-SRDX-KR-BstEII | GGTCACCTCAAGCAAAACCTAATCTAAGTTCCAGATCC<br>AAATCCAAGGAAAAGAATCCTGAATTATC | Repression construct assembly     |
| RolB-F                                     | GCTCTTGCAGTGCTAGATT                                                     | Positive identification           |
| RolB-R                                     | GAAGGTGCAAGCTACCTCTC                                                    | Positive identification           |
| GusA-F                                     | GTGAATCCGCACCTCTGG                                                      | Positive identification           |
| GusA-R                                     | ATCGCCGCTTTGGACATA                                                      | Positive identification           |
| 35S-F32                                    | GAGGACCTAACAGAACTCGCC                                                   | Positive identification           |
| OpWRKY3-R                                  | CCCTCCCTAGTGTGCTGCTGTTTA                                                | Positive identification           |
| OpACTIN-QF                                 | AGCAGCATGAAGATTAAGGTTGTG                                                | qRT-PCR                           |
| OpACTIN-QR                                 | CACATCTGCTGGAAAGTGCTG                                                   | qRT-PCR                           |
| OpWRKY3-QF                                 | CCGACGCAACAAAATCCACA                                                    | qRT-PCR                           |
| OpWRKY3-QR                                 | TGTTATCGGCCACAGATGGG                                                    | qRT-PCR                           |
| OpSTR-QF                                   | AGCCATGGTTGTGTCGATTCT                                                   | qRT-PCR                           |
| OpSTR-QR                                   | TTCACCATCGGAGTCAAAAGC                                                   | qRT-PCR                           |
| OpTDC-QF                                   | TAGGCTCAATCCAGGGAAAGG                                                   | qRT-PCR                           |
| OpTDC-QR                                   | TCCCACAGCAAACCTCAACA                                                    | qRT-PCR                           |
| OpCPR-QF                                   | CCGGCAATATGAGCATTCA                                                     | qRT-PCR                           |
| OpCPR-QR                                   | GTTCTCGCCAAGCAGCAAA                                                     | qRT-PCR                           |
| OpG10H-QF                                  | TGAGGAAGCCGATGTTCC                                                      | qRT-PCR                           |
| OpG10H-QR                                  | TTTCATCACGCCCAATTGCC                                                    | qRT-PCR                           |
| Op10HGO-QF                                 | TAATGGTTGGTGCACCGGAA                                                    | qRT-PCR                           |
| Op10HGO-QR                                 | AGCTTTCAAGAGGCGTTCCA                                                    | qRT-PCR                           |
| OpSLS-QF                                   | AAGCATCCCGAATGGCAAGA                                                    | qRT-PCR                           |
| OpSLS-QR                                   | GAAGCATCACCGTTGGCATC                                                    | qRT-PCR                           |
| OpSGD-QF                                   | ACCGGAAGGAGTGCCTATCT                                                    | qRT-PCR                           |
| OpSGD-QR                                   | CCCCATTCCCATGTGTCCAA                                                    | qRT-PCR                           |
| OpTSB-QF                                   | TGCAGGATGAAGATGGGCAG                                                    | qRT-PCR                           |
| OpTSB-QR                                   | CAGAGTCGGGCACAGTTTCT                                                    | qRT-PCR                           |
| pB42AD-OpWRKY3-EcoR I-F                    | GATTATGCCTCTCCCGAATTCATGGAGAATTCAGCAGA<br>TTGGGA                        | YIH                               |
| pB42AD-OpWRKY3-XhoI-R                      | TGGCGAAGAAGTCCACTCGAGTCAGGAAAAGAATCCT<br>GAATTATCA                      | YIH                               |
| OpCPR-Pro EcoRI-W-boxII-F                  | aattcTTCTGGTCAAAACTTCTGGTCAAAACTTCTGGTC                                 | YIH                               |



OpCPR-Pro XhoI-W-boxII-R      AAAACTc  
                                         tegagAGTTTTGACCAGAAAGTTTTGACCAGAAAGTTTTG      YIH  
                                         ACCAGAAg

---
